# Supplementary material
Source: publisher figshare collection journal article supplement (https://rs.figshare.com/ndownloader/files/13563527)
Supplement: Supplementary file [file 13563527]

# Improving The Resolution Of Layered Crust In Lesser Antilles Arc (LAA)

Data from 26 seismic stations on 10 islands was used to study crustal discontinuities along LAA

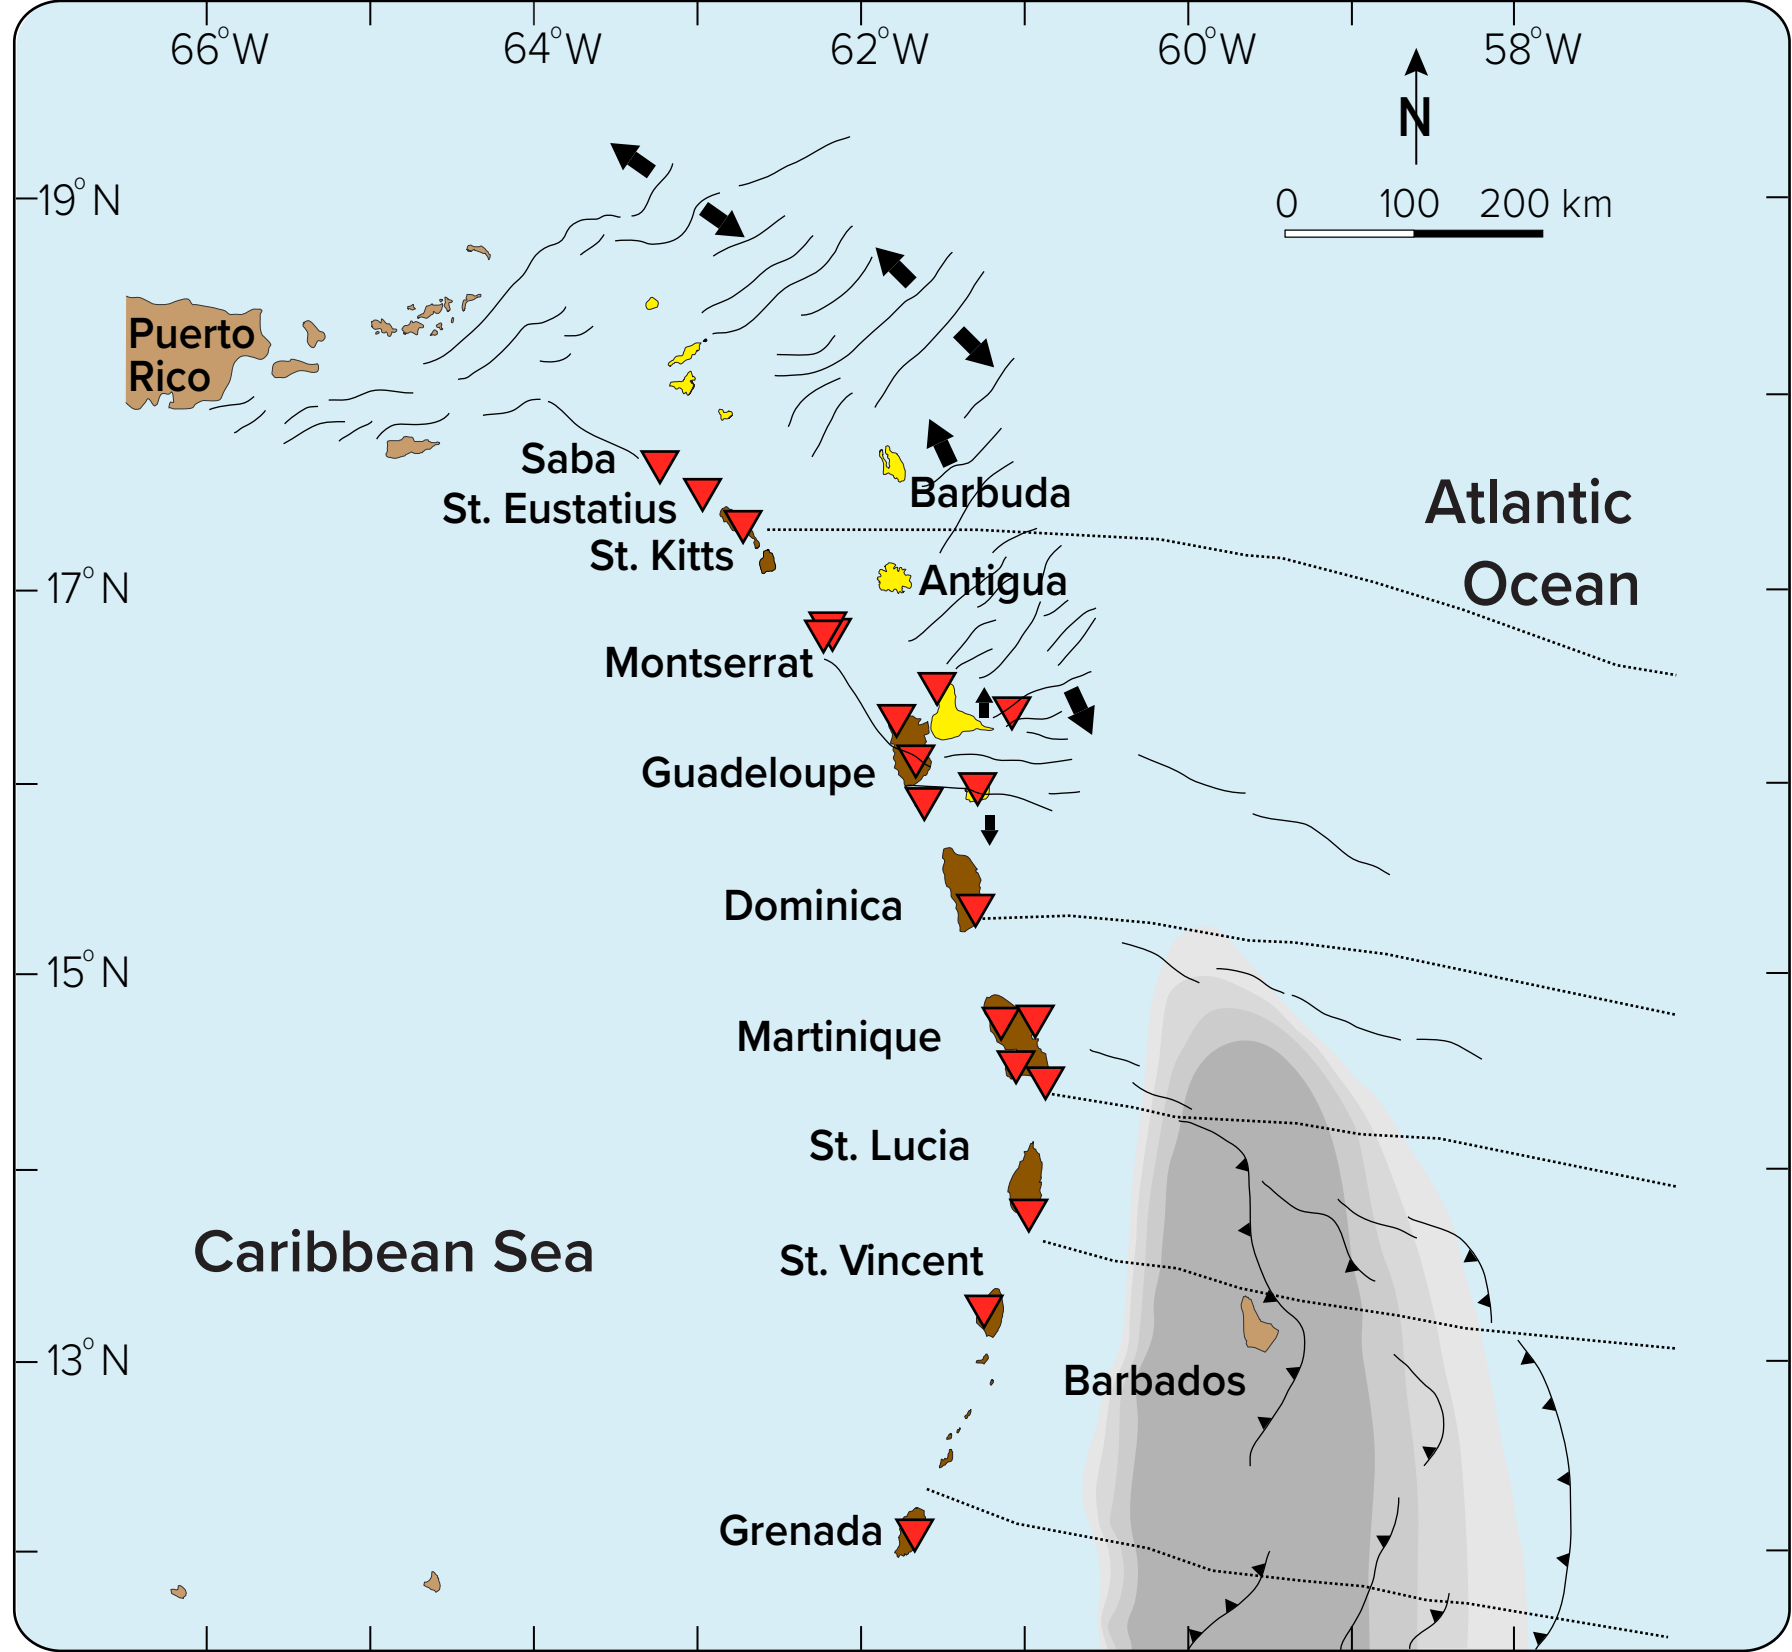

Inversion modelling approach integrating seismic and petrological results was used to circumvent misinterpretations of the former

Modelling approach used showed comparable depth estimates of the crustal discontinuities to those reported by previous studies

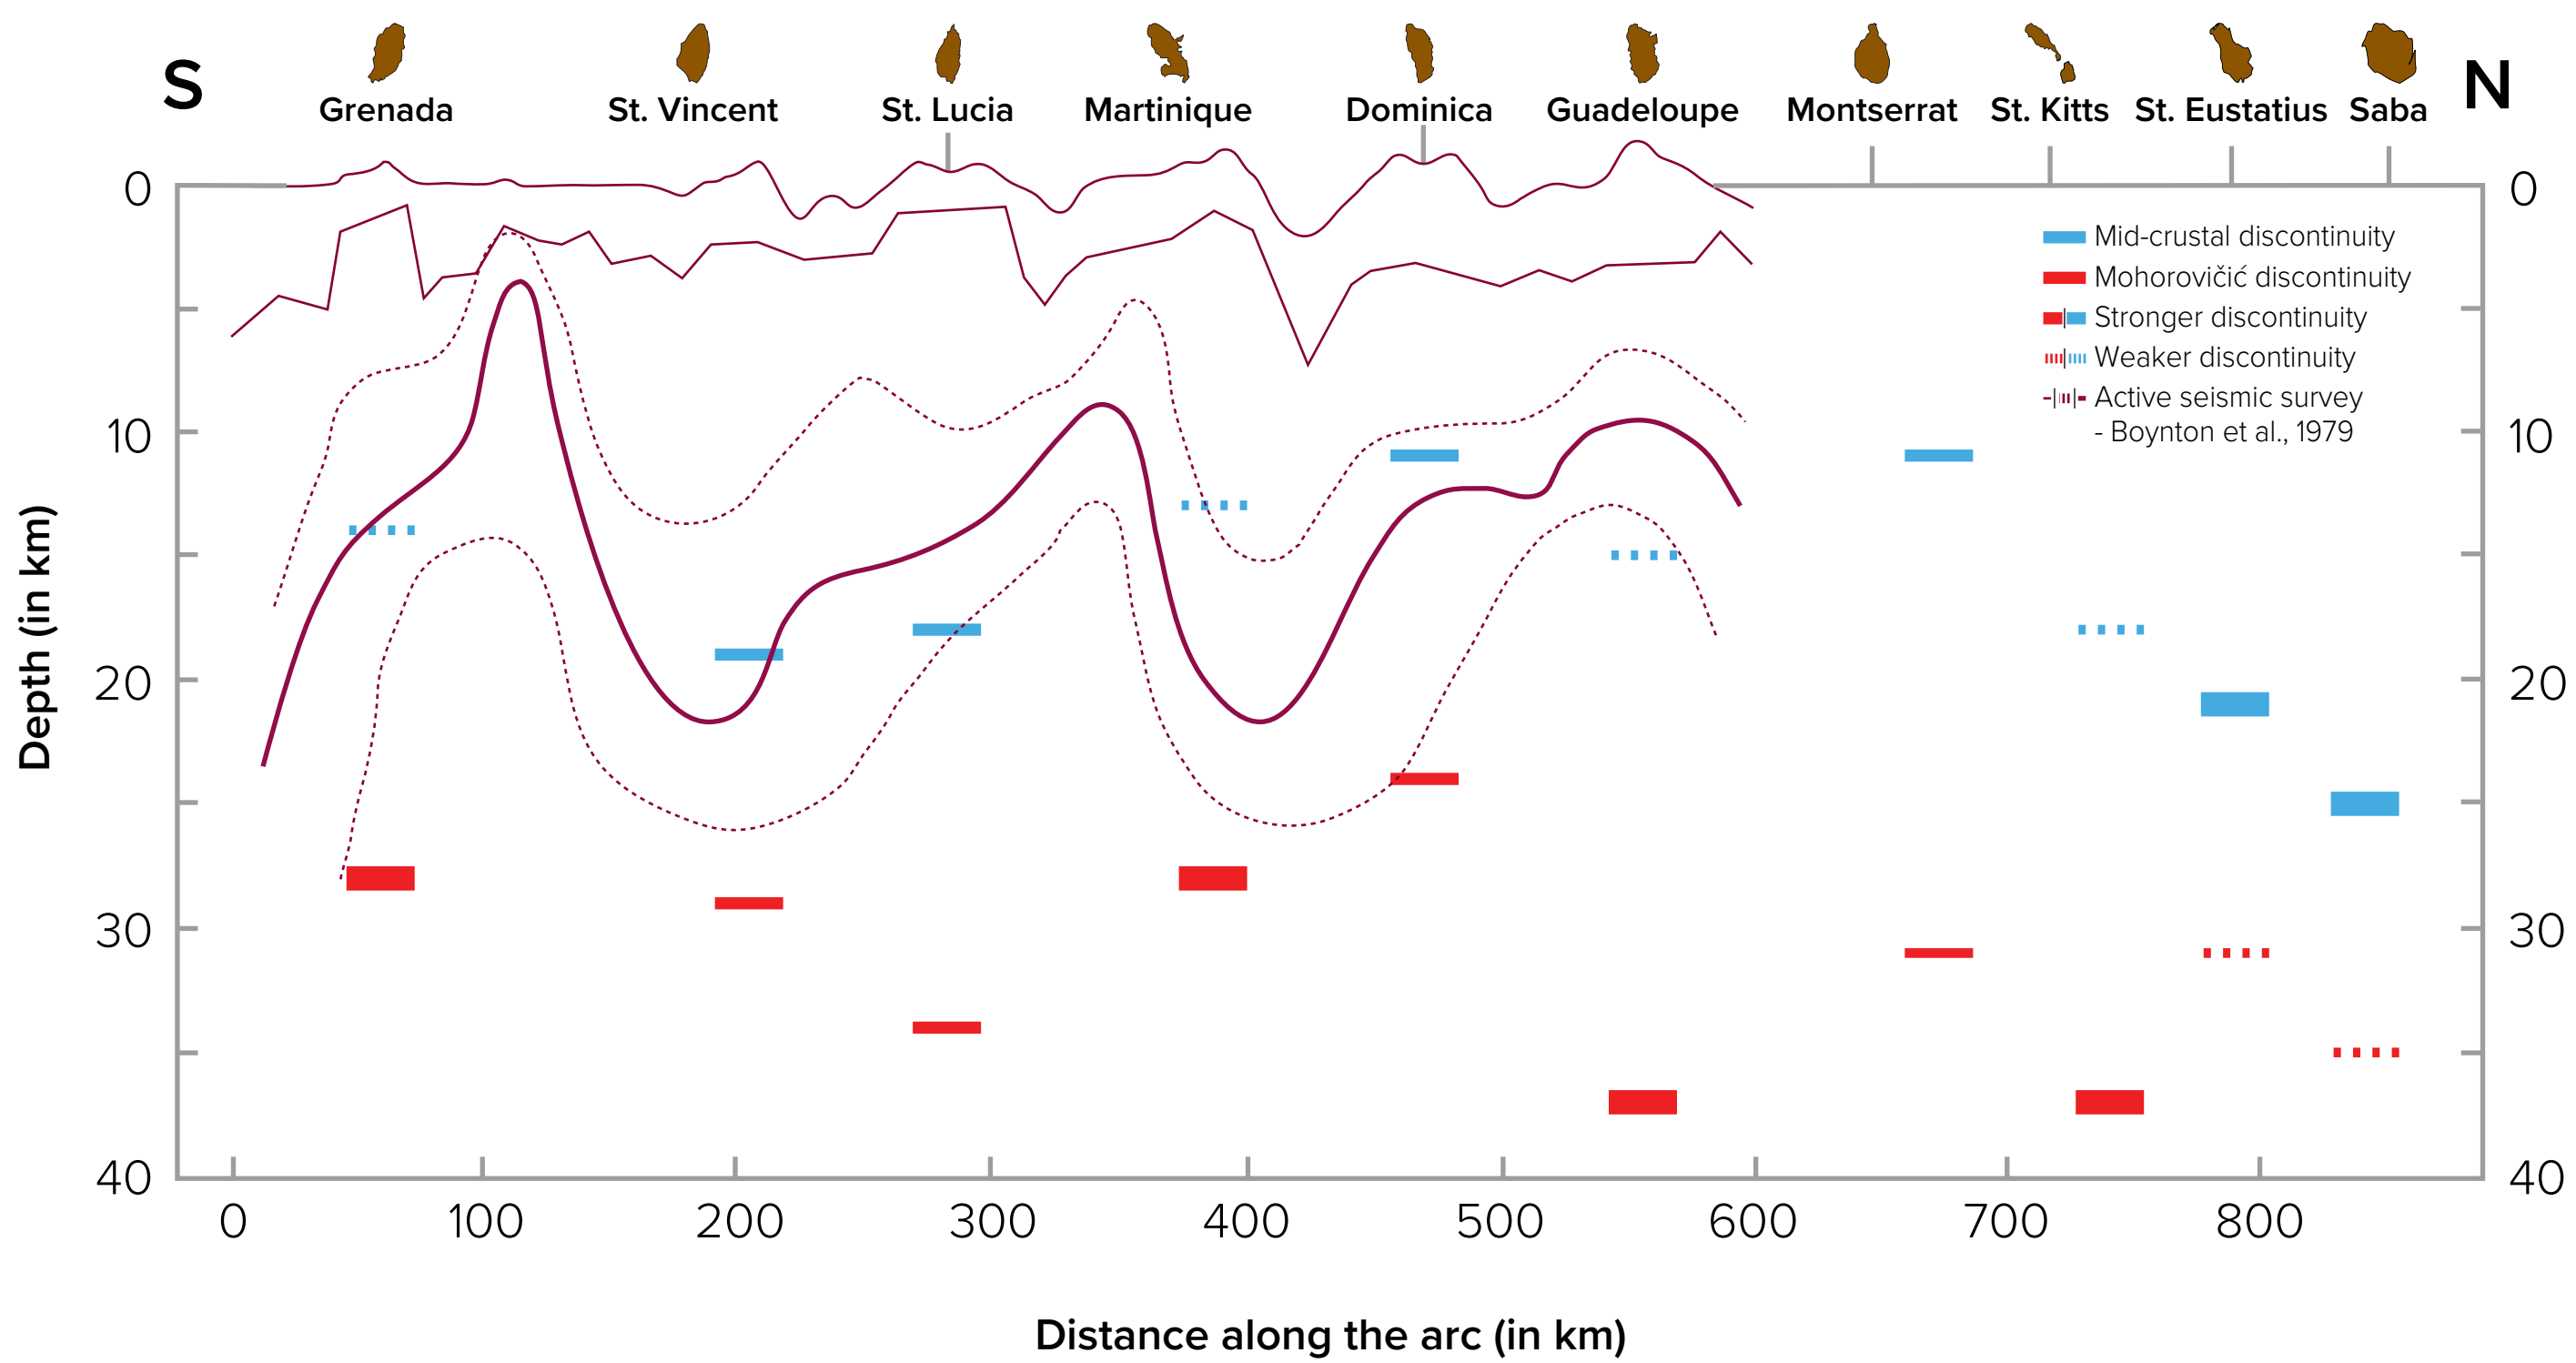

Results also indicated differences in magmatic water content and differentiation history of each island

**Integration of seismological and petrological results enabled detailed study of crustal structure of all major islands in LAA**
